# Supplementary material for: Carbon nanotubes coated with a nitrogen-doped carbon layer and its enhanced electrochemical capacitance
Source: Royal Society of Chemistry journal article supplement (doi:10.1039/c3ta10830a), 2013-01-01
Supplement: c3ta10830a.pdf [file c3ta10830a.pdf]

## *Electronic Supporting Information*

### **Carbon nanotube coated with a nitrogen-doped carbon layer and its enhanced electrochemical capacitance**

Baigang An,<sup>\*a,b</sup> Shifei Xu,<sup>a</sup> Lixiang Li,<sup>a,b</sup> Jing Tao<sup>a</sup>, Fen Huang<sup>a</sup> and Xin Geng<sup>a,b</sup>

<sup>a</sup> School of Chemical Engineering, University of Science and Technology Liaoning, 185 Qianshangzhong Road, Anshan 114051, China.

<sup>b</sup> Institute of Materials Electrochemistry Research, University of Science and Technology Liaoning, 185 Qianshangzhong Road, Anshan 114051, China

\*E-mail: bgan@ustl.edu.cn

SEM images (Fig. S1) and XRD patterns (Fig.S2) of CNTs, CNTs@PPy and NC-CNTs

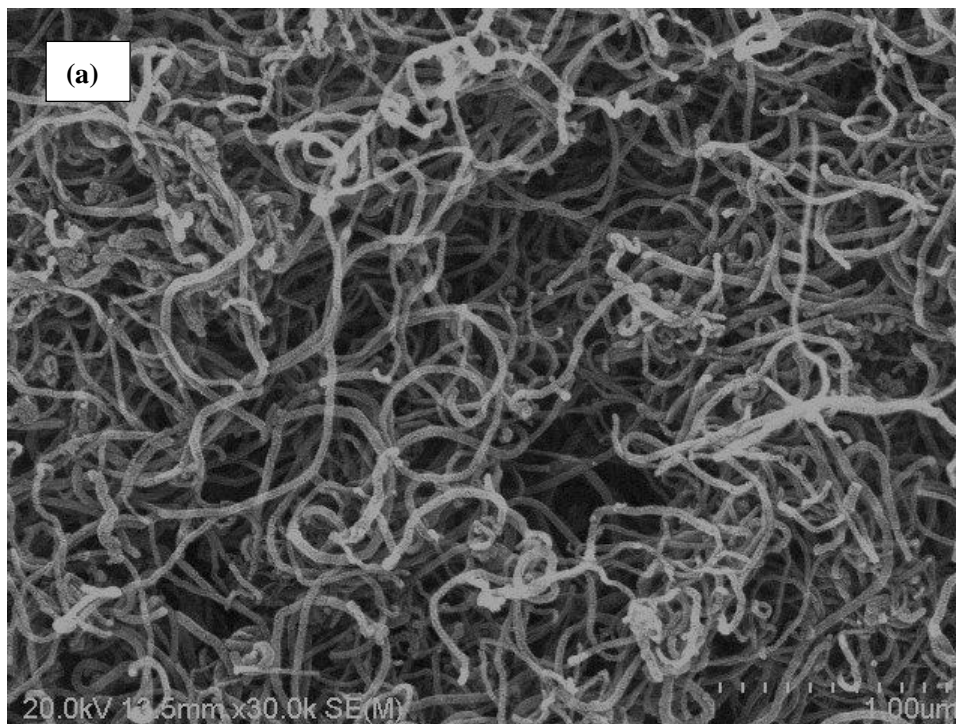

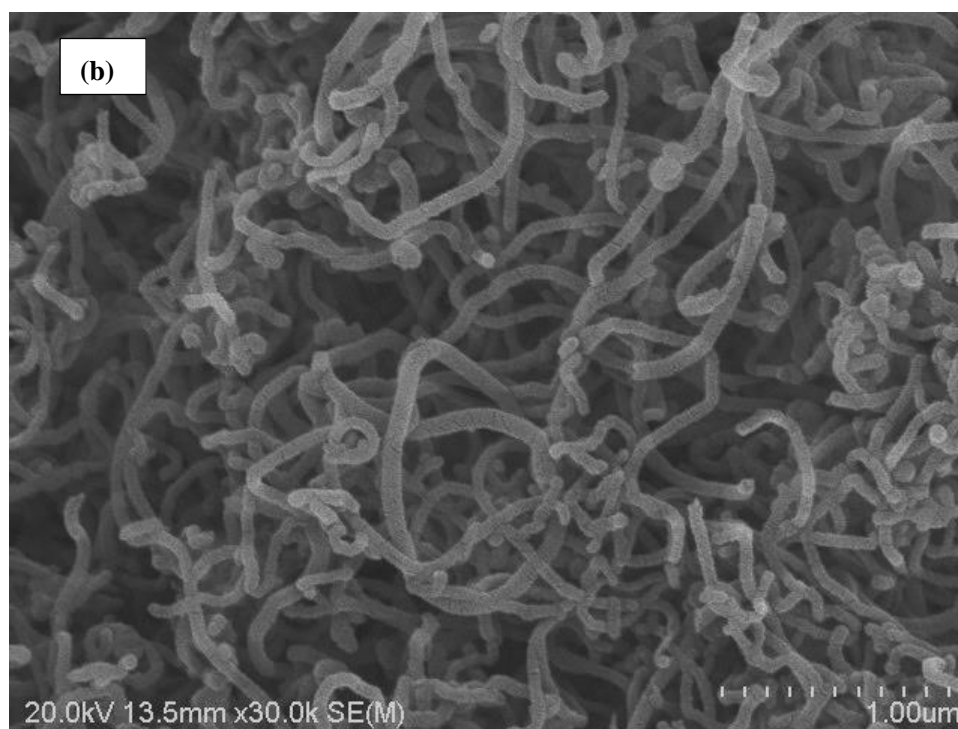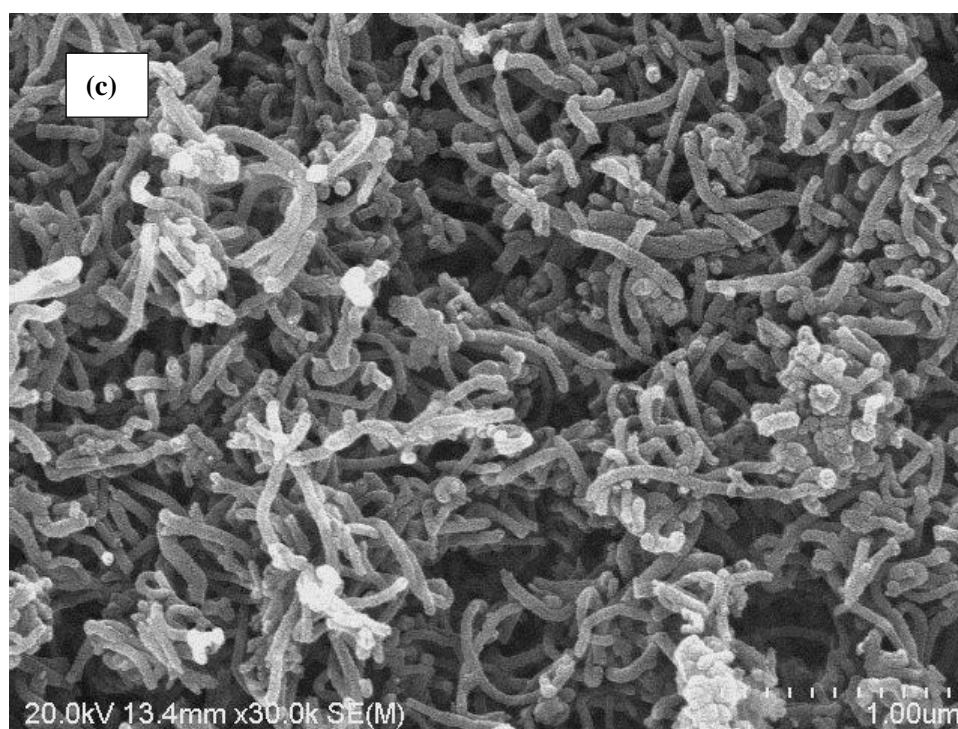

Fig.S1 SEM images of (a) CNTs, (b) CNTs@PPy and (c) NC-CNTs

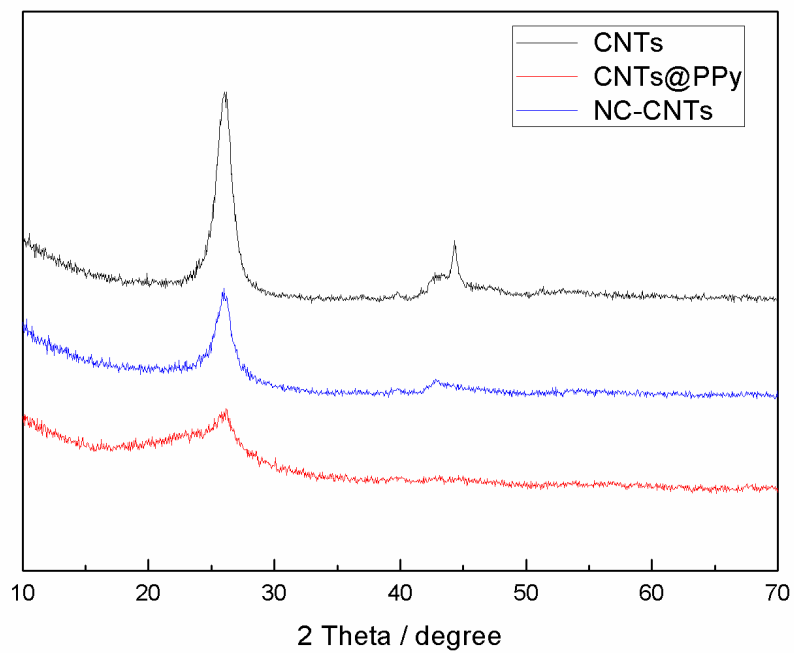

Fig.S2 XRD pattern of CNTs , CNTs@PPy and NC-CNTs
